# THE AMERICAN JOURNAL OF PSYCHIATRY

---

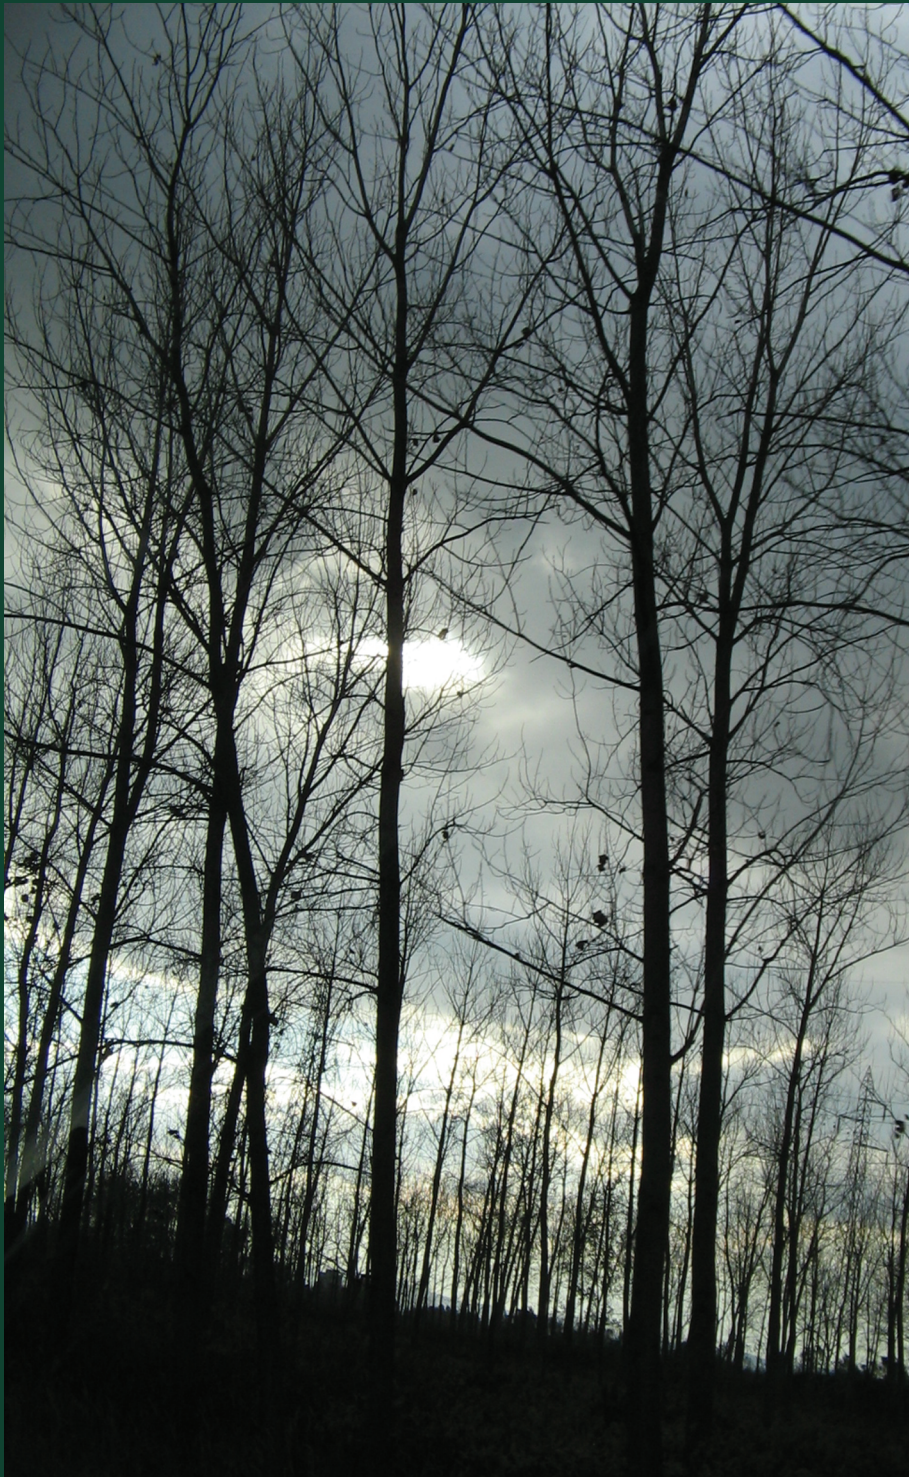

**Chronic Restlessness with  
Antipsychotics**

Irene Bratti et al.

1648

◀ **Affective Disorders and Cognitive  
Failures: A Comparison of  
Seasonal and Non-Seasonal  
Depression**

Brianna Sullivan and

Tabitha W. Payne

1663

**Childhood Psychiatric Disorders  
and Young Adult Crime:  
A Prospective, Population-Based  
Study**

William E. Copeland et al.

1668

**Failure of Extinction of Fear  
Responses in Posttraumatic Stress  
Disorder: Evidence From  
Second-Order Conditioning**

Michèle Wessa and Herta Flor

1684

**Continuing Medical Education** 1768

**November 2007**

**Volume 164 • Number 11**

---

Official Journal of the  
AMERICAN PSYCHIATRIC ASSOCIATION

---

[ajp.psychiatryonline.org](http://ajp.psychiatryonline.org)
