# THE AMERICAN JOURNAL OF PSYCHIATRY

## EDITOR-IN-CHIEF

Robert Freedman, M.D.

## DEPUTY EDITORS

David A. Lewis, M.D.

Robert Michels, M.D.

Daniel S. Pine, M.D.

Susan K. Schultz, M.D.

Carol A. Tamminga, M.D.

## EDITORIAL STAFF

### Editorial Director

Michael D. Roy

### Senior Editor/Features Writer

Jane Weaver, E.L.S.

### Senior Editors

John J. Guardiano, Ph.D.  
Leannah M. Harding, M.S., E.L.S.

### Assistant Editors

Lisa Devine  
Angela Moore

### Production Editor

Julie C. Blair

### Senior Graphic Designer

Jason Glance

### Editorial Manager

Molly Douglas

### Editorial Assistant

Samantha Luck

### Administrative Assistant

Kourtney Skinner

### Assistants to the Editors

Lois Campbell  
Kerianne Hansen  
Rachel Hogg  
Russell A. Scholl

## ASSOCIATE EDITORS

Wade H. Berrettini, M.D., Ph.D.

Kathleen T. Brady, M.D., Ph.D.

David P. Brent, M.D.

Linda Brzustowicz, M.D.

Cameron S. Carter, M.D.

Leon Eisenberg, M.D.

Glen O. Gabbard, M.D.

Howard H. Goldman,  
M.D., Ph.D.

Jeffrey A. Lieberman, M.D.

Robert C. Malenka, M.D., Ph.D.

Maria A. Oquendo, M.D.

Barbara L. Parry, M.D.

Jerrold F. Rosenbaum, M.D.

Larry J. Siever, M.D.

Patricia Suppes, M.D., Ph.D.

Myrna M. Weissman, Ph.D.

## EDITORS EMERITI

Nancy C. Andreasen,  
M.D., Ph.D.

John C. Nemiah, M.D.

## FORMER EDITORS

Amariah Brigham, M.D.  
1844-1849

T. Romeyn Beck, M.D.  
1849-1854

John P. Gray, M.D.  
1854-1886

G. Alder Blumer, M.D.  
1886-1894

Richard Dewey, M.D.  
1894-1897

Henry M. Hurd, M.D.  
1897-1904

Edward N. Brush, M.D.  
1904-1931

Clarence B. Farrar, M.D.  
1931-1965

Francis J. Braceland, M.D.  
1965-1978

The American Journal of Psychiatry is online at [ajp.psychiatryonline.org](http://ajp.psychiatryonline.org)

# THE AMERICAN PSYCHIATRIC ASSOCIATION

1000 Wilson Blvd., Suite 1825, Arlington, VA 22209-3901  
(888) 357-7924 (toll-free inside the U.S. and Canada) / (703) 907-7300  
web site: [www.psych.org](http://www.psych.org) / e-mail: [apa@psych.org](mailto:apa@psych.org)

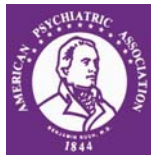

## OFFICERS 2007–2008

|                            |                                |
|----------------------------|--------------------------------|
| <b>President</b>           | Carolyn B. Robinowitz, M.D.    |
| <b>President-Elect</b>     | Nada L. Stotland, M.D., M.P.H. |
| <b>Vice-President</b>      | Carol Bernstein, M.D.          |
| <b>Secretary-Treasurer</b> | Donna M. Norris, M.D.          |

## ASSEMBLY

|                      |                      |
|----------------------|----------------------|
| <b>Speaker</b>       | Jeffrey Akaka, M.D.  |
| <b>Speaker-Elect</b> | Ronald M. Burd, M.D. |
| <b>Recorder</b>      | Gary Weinstein, M.D. |

## MEDICAL DIRECTOR'S OFFICE

|                                                                               |                                   |
|-------------------------------------------------------------------------------|-----------------------------------|
| <b>Medical Director</b>                                                       | James Scully, M.D.                |
| <b>Chief Executive Officer,<br/>American Psychiatric<br/>Publishing, Inc.</b> | Ronald E. McMillen                |
| <b>Executive Director,<br/>APIRE<br/>Division of Research</b>                 | Darrel A. Regier, M.D.,<br>M.P.H. |

## BOARD OF TRUSTEES

|                                    |                                |
|------------------------------------|--------------------------------|
| Thomas K. Ciesla, M.D.             | Steven S. Sharfstein, M.D.     |
| Mary Helen Davis, M.D.             | Anne Marie T. Sullivan, M.D.   |
| David Fassler, M.D.                | John Chapman Urbaitis,<br>M.D. |
| Jeffrey L. Geller, M.D.,<br>M.P.H. | Amy M. Ursano, M.D.            |
| Roger Peele, M.D.                  | Sidney H. Weissman, M.D.       |
| Michelle B. Riba, M.D., M.S.       | William M. Womack, M.D.        |
| Pedro Ruiz, M.D.                   |                                |

## AMERICAN PSYCHIATRIC PUBLISHING, INC.

### BOARD OF DIRECTORS 2006–2009

|                            |                                         |
|----------------------------|-----------------------------------------|
| <b>President and Chair</b> | Alan F. Schatzberg, M.D.                |
| <b>Secretary</b>           | Katharine Phillips, M.D.                |
| <b>Treasurer</b>           | Joan A. Lang, M.D.                      |
| Dwight L. Evans, M.D.      | Pedro Ruiz, M.D.                        |
| John M. Oldham, M.D.       | Donna E. Stewart, M.D.,<br>F.R.C.P.(C.) |
| Laura W. Roberts, M.D.     |                                         |

### EX-OFFICIO MEMBERS

|                                                  |                                |
|--------------------------------------------------|--------------------------------|
| <b>APA President</b>                             | Carolyn B. Robinowitz, M.D.    |
| <b>APA President-Elect</b>                       | Nada L. Stotland, M.D., M.P.H. |
| <b>APA Secretary-Treasurer</b>                   | Donna M. Norris, M.D.          |
| <b>APA Medical Director</b>                      | James Scully, M.D.             |
| <b>Editor-in-Chief,<br/>Psychiatric Services</b> | Howard Goldman, M.D.           |
| <b>Editor-in-Chief, Books</b>                    | Robert E. Hales, M.D., M.B.A.  |

The American Journal of Psychiatry is online at [ajp.psychiatryonline.org](http://ajp.psychiatryonline.org)

# THE AMERICAN PSYCHIATRIC ASSOCIATION

## Chairpersons of Councils, Commissions, Committees, and Task Forces

### Standing Committees

*Audit*  
Donna M. Norris, M.D.

*Finance and Budget*  
Jack W. Bonner III, M.D.

*Bylaws*  
John O. Gaston, M.D.

*Elections*  
Maria T. Lymberis, M.D.

*Ethics*  
Wade C. Myers, M.D.

*Investment Oversight*  
John G. Looney, M.D.

*Joint Reference*  
Nada L. Stotland, M.D.,  
M.P.H.

*Membership*  
Joseph Ezra V. Rubin, M.D.

*Nominating*  
Pedro Ruiz, M.D.

*Tellers*  
William B. Lawson, M.D.,  
Ph.D.

### Council on Addiction Psychiatry

Eric C. Strain, M.D.

*Training and Education  
in Addiction Psychiatry*  
John A. Renner, Jr., M.D.

*Treatment Services for Patients  
With Addictive Disorders*  
Petros Levounis, M.D.

### Council on Advocacy and Public Policy

Roger D. Walker, M.D.

*Advocacy and Litigation Funding*  
Jeffrey Stuart Janofsky, M.D.

*Government Relations*  
Barry Bruce Perlman, M.D.

*Public Affairs*  
William E. Callahan, M.D.

### Council on Aging

Robert Paul Roca, M.D.

*Access and Effectiveness of  
Psychiatric Services for the Elderly*  
James Allen Greene, M.D.

*Ethnic Minority Elderly*  
Maria D. Llorente, M.D.

*Long-Term Care and  
Treatment for the Elderly*  
Peter Vincent Rabins, M.D.

### Council on Children, Adolescents, and Their Families

David A. Mrazek, M.D.

*Developmental Disabilities*  
Joel D. Bregman, M.D.

*Family Violence and Abuse*  
Gail Erlick Robinson, M.D.

*Blanche F. Ittleson Research Award*  
Elizabeth B. Weller, M.D.

*Juvenile Justice Issues*  
Stephen B. Billick, M.D.

*Agnes Purcell McGavin Award*  
John E. Schowalter, M.D.

*Infancy and Early Childhood*  
Jean M. Thomas, M.D.

*Mental Health and Schools*  
Marcia J. Slattery, M.D.

*Mental Health on College and  
University Campuses*  
Jerald Kay, M.D.

### Council on Global Psychiatry

Lawrence Hartmann,  
M.D.

*Misuse and Abuse of Psychiatry*  
Alan A. Stone, M.D.

*Psychiatric Dimensions of Disasters*  
S. Arshad Husain, M.D.

### Council on Healthcare Systems and Financing

Anita Smith Everett, M.D.

*Access to Care and Reimbursement*  
Donna T. Chen, M.D.

*APA/Business Relations*  
Alan Langlieb, M.D.

*Managed Care*  
Paul Henry Wick, M.D.

*Medicare Advisory*  
Edward Gordon, M.D.

*Psychiatry in the Workplace*  
Andrea G. Stolar, M.D.

*Public Funding for Psychiatric  
Services*  
Selby C. Jacobs, M.D.

*Reimbursement for Psychiatric Care*  
Joseph T. English, M.D.

*RBRVS, Codes and Reimbursement*  
Ronald M. Burd, M.D.

### Council on Medical Education and Lifelong Learning

Sandra Sexson, M.D.

*APA/Bristol-Myers Squibb  
Fellowship Selection*  
David W. Preven, M.D.

*APA/SAMHSA Minority Fellowship  
Selection and Advisory*  
Tana Annette Grady-Weliky,  
M.D.

*APA/GlaxoSmithKline  
Fellowship Selection and Program*  
Leah Joan Dickstein, M.D.

*APA/Lilly Products  
Resident Research Award*  
Charles L. Bowden, M.D.

*CME/Lifelong Learning*  
Mark Hyman Rapaport,  
M.D.

*Commercial Support*  
Spencer Eth, M.D.

*Graduate Education*  
Sidney Herman Weissman,  
M.D.

*History and Library*  
Laura D. Hirshbein, M.D.

*Joint Sponsorship of Continuing  
Medical Education (CME)*  
Adam T. Kaul, M.D.

*Medical Student Education*  
Linda Faith Pessar, M.D.

*Psychiatric Administration  
and Management*  
L. Mark Russakoff, M.D.

*Residents and Fellows*  
Molly K. McVoy, M.D.

*Scientific Program*  
David Arnold Baron, M.D.

*Scientific Program Committee of the  
Institute on Psychiatric Services*  
Stephen M. Goldfinger, M.D.

*Vestermark Award*  
Frederick G. Guggenheim,  
M.D.

### Council on Member and District Branch Relations

Jeffrey S. Akman, M.D.

*Distinguished Service Award*  
Carolyn B. Robinowitz, M.D.

*Newsletter of the Year*  
Denis J. Milke, M.D.

*Physician Health, Illness  
and Impairment*  
Malkah T. Notman, M.D.

### Council on Minority Health and Health Disparities

Sandra C. Walker, M.D.

*American Indian, Alaska Native and  
Native Hawaiian Psychiatrists*  
Daniel L. Dickerson, D.O.

*Asian-American Psychiatrists*  
Mona H. Gill, M.D.

*Black Psychiatrists*  
Michele Reid, M.D.

*Gay, Lesbian, and Bisexual Issues*  
Serena Volpp, M.D.

*Hispanic Psychiatrists*  
Andres J. Pumariega, M.D.

*International Medical Graduates*  
Sanjay Dube, M.D.

*Religion, Spirituality, and Psychiatry*  
John Raymond Peteet, M.D.

*Women*  
Melva J. Green, M.D.

### Council on Psychiatry And Law

Paul S. Appelbaum, M.D.

*Confidentiality*  
William F. Haning, M.D.

*Isaac Ray Award*  
J. Richard Ciccone, M.D.

*Judicial Action*  
Jeffrey L. Metzner, M.D.

*Manfred S. Guttmacher Award*  
Patricia R. Recupero, M.D.,  
J.D.

### Council on Psychosomatic Medicine

Thomas N. Wise, M.D.

*Education and Training*  
Mary Jane Massie, M.D.

*Research*  
Joel Edward Dimsdale, M.D.

### Council on Quality Care

Daniel K. Winstead, M.D.

*AIDS*  
Francisco Fernandez, M.D.

*Electronic Health Records*  
Farrell H. Brazier, M.D.

*Patient Safety*  
Alfred Herzog, M.D.

*Prevention of Mental Disorders and  
Promotion of Mental Health*  
William Rigby Beardslee,  
M.D.

*Psychotherapy by Psychiatrists*  
Eric Martin Plakun, M.D.

*Quality Indicators*  
Marvin I. Herz, M.D.

*Standards and Survey Procedures*  
Jeanne L. Steiner, D.O.

*Steering Committee on Practice  
Guidelines*  
John S. McIntyre, M.D.

### Council on Research

Jeffrey A. Lieberman, M.D.

*Electroconvulsive and Other  
Electromagnetic Therapies*  
Sarah H. Lisanby, M.D.

*Health Services Research*  
Javier I. Escobar, M.D.

*Psychiatric Diagnosis  
and Assessment*  
Michael B. First, M.D.

*Research Awards*  
Stuart C. Yudofsky, M.D.

*Research Ethics*  
Laura W. Roberts, M.D.

*Research on Psychiatric Treatments*  
Jeffrey A. Lieberman, M.D.

*Research Training*  
Charles B. Nemeroff, M.D.

*Task Force on Complementary and  
Alternative Medicine*  
Marlene Picus Freeman,  
M.D.

### Council on Social Issues and Public Psychiatry

Carl Compton Bell, M.D.

*Mental Healthcare for Veterans &  
Military Personnel & Their  
Families*  
Harold Stephen Kudler,  
M.D.

*Persons With Mental Illness in the  
Criminal Justice System*  
Henry C. Weinstein, M.D.

*Poverty, Homelessness,  
and Psychiatric Disorders*  
Jeffrey Gress Stovall, M.D.

*Psychiatric Services  
Achievement Awards*  
Joel S. Feiner, M.D.

*Task Force on Forensic Outpatient  
Services*  
Steven Kenny Hoge, M.D.
